# Supplementary material for: Dependence on co-adsorbed water in the reforming reaction of ethanol on a Rh(111) surface
Source: Royal Society of Chemistry journal article supplement (doi:10.1039/d0ra02015j), 2020-01-01
Supplement: d0ra02015j1.pdf [file d0ra02015j1.pdf]

## Supplementary Information

### **Dependence on co-adsorbed water in the reforming reaction of ethanol on Rh(111) surface**

**Yu-Yao Hsia<sup>a</sup>, Po-Cheng Chien<sup>b</sup>, Lu-Hsin Lee<sup>a</sup>, Yu-Ling Lai<sup>c</sup>, Yao-Jane Hsu<sup>c</sup>,  
Jeng-Han Wang<sup>b,\*</sup> and Meng-Fan Luo<sup>a,\*</sup>**

*<sup>a</sup>Department of Physics, National Central University, No. 300 Jhongda Road, Jhongli  
District, Taoyuan 32054, Taiwan*

*<sup>b</sup>Department of Chemistry, National Taiwan Normal University, No. 88, Sec. 4, Ting-  
Zhou Road, Taipei, Taiwan*

*<sup>c</sup>National Synchrotron Radiation Research Center, 101 Hsin-Ann Road, Hsinchu  
Science Park, Hsinchu 30076, Taiwan*

Figure S1 shows the D<sub>2</sub>O TPD spectra for 1.0- and 2.0-L D<sub>2</sub>O adsorbed on Rh(111) surface at 120 K. For 1.0-L D<sub>2</sub>O (lower one), a primary desorption feature was centered about 170 K, corresponding to monolayer D<sub>2</sub>O on the surface; for 2.0-L D<sub>2</sub>O (upper one), an additional desorption feature appeared about 150 K, attributed to multilayer D<sub>2</sub>O. The desorption temperature of the monolayer D<sub>2</sub>O on Rh(111) is about 25 K lower than that on Rh(111)<sub>O\*(0.08 ML)</sub>, because on Rh(111)<sub>O\*(0.08 ML)</sub> D<sub>2</sub>O\* interacts with O\* and a hydrogen-bonded network of D<sub>2</sub>O\* and OD\* forms [1].

Figure S2(a) and (b) show the DHO ( $m/z = 19$  u) TPD spectra from Rh(111)<sub>O\*(0.08 ML)</sub> exposed to D<sub>2</sub>O of varied amounts (denoted as Rh(111)<sub>D<sub>2</sub>O\*/O\*(0.08 ML)</sub>) and to D<sub>2</sub>O of varied amounts and subsequently 3.0-L ethanol. The desorption contained evident DHO signals largely because the D<sub>2</sub>O exposure contained some DHO (monitored with mass spectrometer), formed on exchange of H and D of dosed D<sub>2</sub>O and background H<sub>2</sub>O. The desorption behavior of DHO resembles that of D<sub>2</sub>O. With the co-adsorption of ethanol, the multilayer desorption feature of DHO was enhanced ((a) and (b)), since adsorbed ethanol diffused toward the Rh(111) surface and exchanged position with underlying DHO. Figure S2(c) plots the integrated intensities of the DHO desorption features in (a) and (b) as a function of D<sub>2</sub>O exposure. It is noted that the DHO signals from the sample with ethanol (red) were constantly greater than those without ethanol (black). The greater DHO signals from co-adsorbed ethanol arise from an additional

channel: surface OD\* (from  $D_2O^* + O^* \rightarrow 2OD^*$  and  $DHO^* + O^* \rightarrow OD^* + OH^*$ )

abstracted H from ethanol and desorbed as DHO.

Figure S3 plots the total adsorbed ethanol (denoted as  $ethanol_{(t)}$ ), measured with the integrated intensities of the corresponding desorption features, as a function of  $D_2O$  exposure. The  $ethanol_{(t)}$  contains ethanol in multilayer regime and  $ethanol_{(int)}$ ; the  $ethanol_{(int)}$  consisted of those adsorbing directly on Rh(111) surface and those migrating from top  $D_2O$  overlayers to the  $D_2O$ -Rh(111) interface to react or desorb, so contained desorbing and decomposing ethanol at the Rh(111) surface. The  $ethanol_{(t)}$  decreased with increasing  $D_2O$  overlayers primarily because of a smaller sticking coefficient onto  $D_2O$  overlayers than that onto Rh(111) surface. The decreasing trend of  $ethanol_{(t)}$  resembles in general that of  $ethanol_{(int)}$  (Figure 2(d)); the latter decreased slightly more than the former as the  $D_2O$  overlayers obstructed a little the diffusion of ethanol toward the Rh surface.

Figure S4 shows  $D_2$  and DH TPD spectra from  $Rh(111)_{O^*(0.08 ML)}$  exposed to  $D_2O$  of varied amounts (0, 1.0 and 4.0 L) and subsequently 3.0-L ethanol. Both  $D_2$  and DH signals were very small, amounting roughly to 1 – 2 % that of  $H_2$  signals. The result implies few  $D^*$  and hence limited dissociation via  $D_2O^* \rightarrow OD^* + D^*$ ; the  $OD^*$  was produced primarily through  $D_2O^* + O^* \rightarrow 2OD^*$ .

Figure S5 shows schemes for the decomposition of  $CH_3CH_2O^*$ , producing (a)

**CH<sub>2</sub>CH<sub>2</sub>**, (b) **CO**, (c) **CH<sub>4</sub>** and (d) **H<sub>2</sub>**. It is presented here as a complement for Figure 5. The corresponding energies of  $\Delta E/E_a$  on clean Rh(111) and Rh(111)<sub>OH\*</sub> surfaces are shown in blue and red numbers (in eV), respectively.

Table S1 compares the calculated energies ( $E_{ads}$ ,  $\Delta E$  and  $E_a$ ) in the present work and previous studies. They exhibit similar values and trends.

## References

- [1] A.E. Shavorskiy, T. Eralp, E. Ataman, C. Isvoranu, J. Schnadt, J.N. Andersen, G. Held, Dissociation of Water on Oxygen-Covered Rh{111}, J. Chem. Phys., 131 (2009) 214707.

**Figure S1**

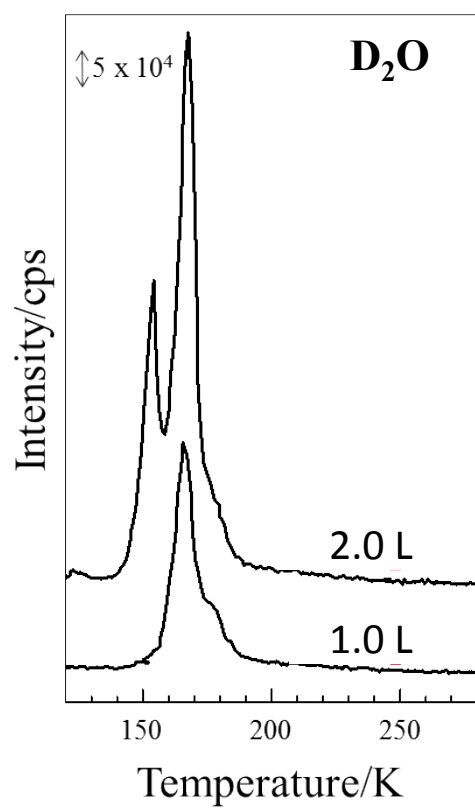

**Figure S1** D<sub>2</sub>O TPD spectra from Rh(111) exposed to 1.0- and 2.0-L at 120 K.

Figure S2

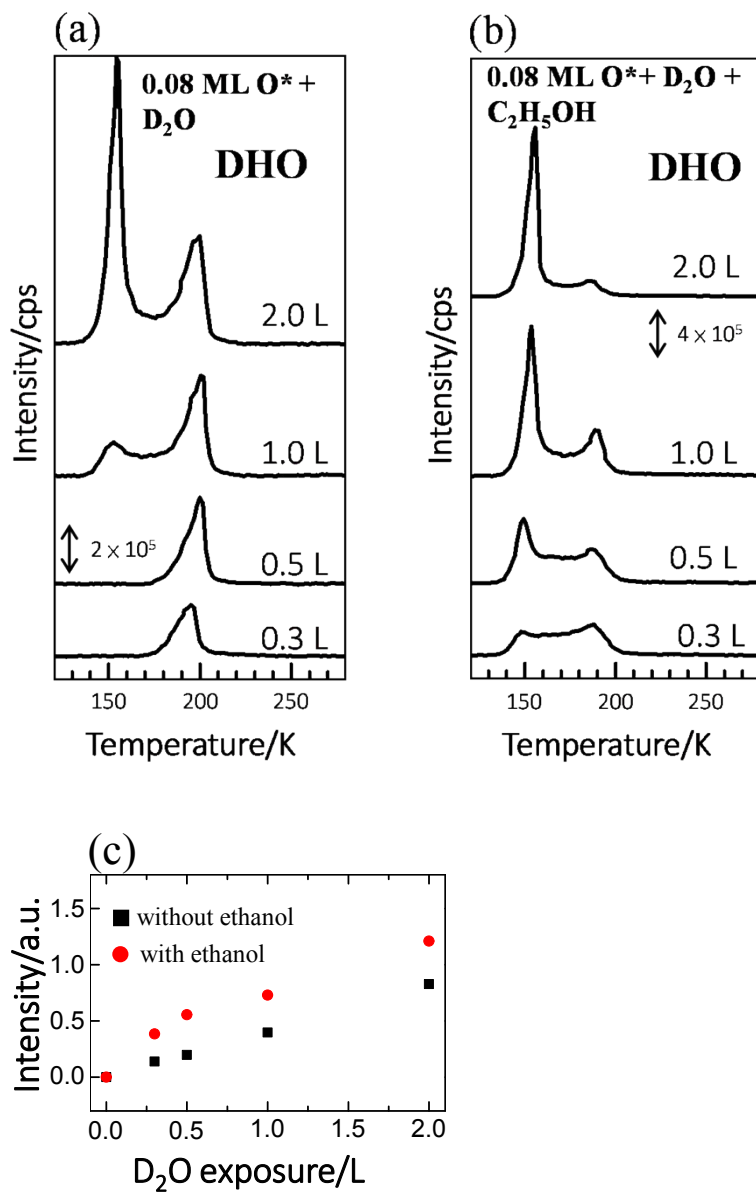

**Figure S2** DHO TPD spectra from Rh(111)<sub>O\*(0.08 ML)</sub> exposed to (a) D<sub>2</sub>O of varied amounts, as indicated, and to (b) D<sub>2</sub>O of varied amounts and subsequently 3.0-L ethanol. (c) plots the integrated intensities of the DHO desorption features in (a) and (b) as a function of D<sub>2</sub>O exposure; black squares and red spheres denote the data from the sample without and with ethanol, respectively.

**Figure S3**

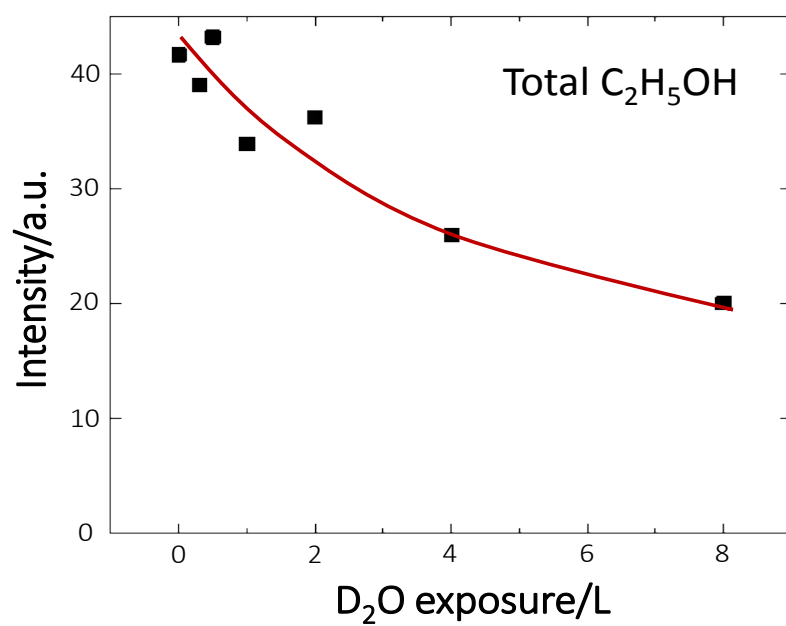

**Figure S3** the quantity of total adsorbed ethanol as a function of D<sub>2</sub>O exposure. The

red line is drawn to guide the eyes.

**Figure S4**

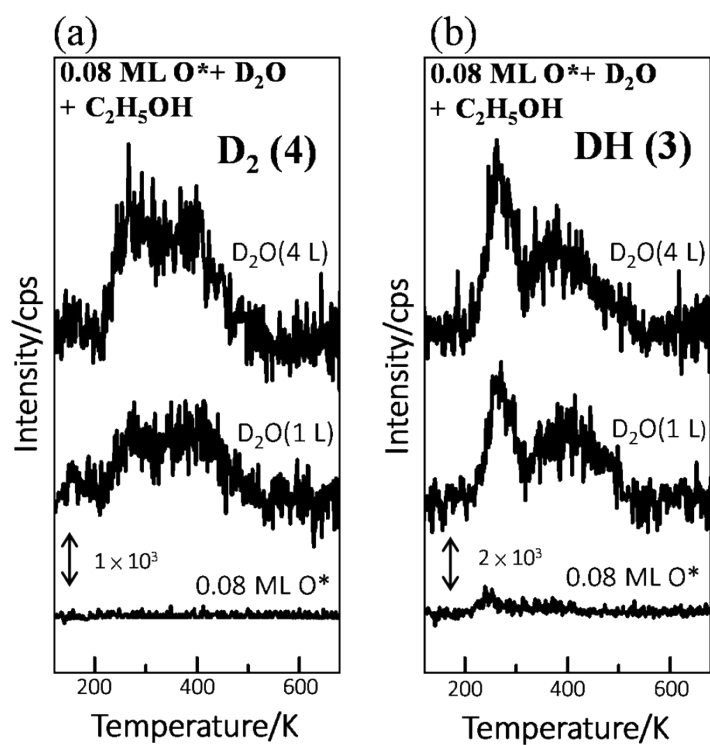

**Figure S4** (a) D<sub>2</sub> and (b) DH TPD spectra from Rh(111)<sub>O\*(0.08 ML)</sub> exposed to D<sub>2</sub>O of varied amounts, as indicated, and subsequently 3.0-L ethanol.



**Figure S5**

(a) **CH<sub>2</sub>CH<sub>2</sub>** formation

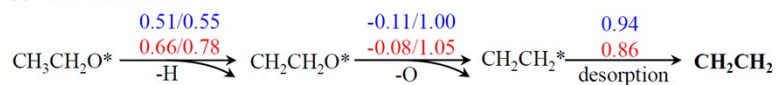

(b) **CO** formation

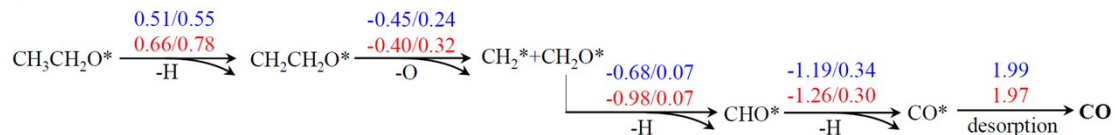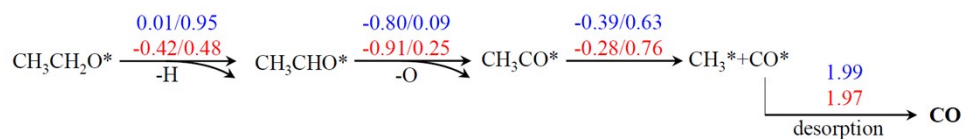

(c) **CH<sub>4</sub>** formation

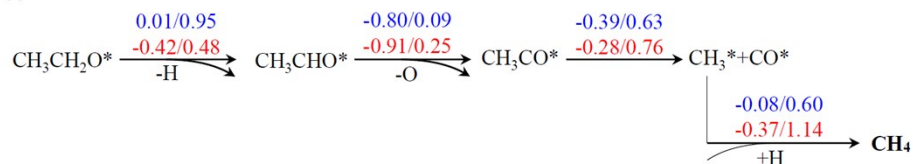

(d) **H<sub>2</sub>** formation

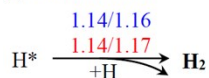

**Figure S5** Schemes for CH<sub>3</sub>CH<sub>2</sub>O\* decomposition forming (a) **CH<sub>2</sub>CH<sub>2</sub>**, (b) **CO**, (c) **CH<sub>4</sub>** and (d) **H<sub>2</sub>**, as a complement for Figure 5. The corresponding energies of  $\Delta E/E_a$  on clean Rh(111) and OH\* covered Rh(111)<sub>OH\*</sub> surfaces are shown in blue and red numbers (in eV), respectively.

**Table S1** Energy ( $E_{ads}$ ,  $\Delta E$  and  $E_a$ ) comparison of the present work and previous studies.

|                                                              | Present    | Ref. 8     | Ref. 21    | Ref. 32    | Ref. 33   | Ref. 42    |
|--------------------------------------------------------------|------------|------------|------------|------------|-----------|------------|
| <u><math>E_{ads}</math> comparison</u>                       |            |            |            |            |           |            |
| $H_2O \rightarrow H_2O^*$                                    | -0.37      |            | -0.27      |            |           |            |
| $CH_2CH_2 \rightarrow CH_2CH_2^*$                            | -0.94      |            |            |            |           |            |
| $CO \rightarrow CO^*$                                        | -1.99      | -1.84      | -1.70      |            |           |            |
| $CH_3CH_2OH \rightarrow CH_3CH_2OH^*$                        | -0.32      | -0.46      | -0.28      | -0.46      | -0.45     | -0.59      |
| <u><math>\Delta E</math> and <math>E_a</math> comparison</u> |            |            |            |            |           |            |
| $O^*+H_2O^* \rightarrow 2OH^*$                               | 0.20/0.98  |            |            |            |           |            |
| $CH_3CH_2OH^*+OH^* \rightarrow CH_3CH_2O^*+H_2O^*$           | -0.66/0.23 |            |            |            |           |            |
| $CH_3CH_2OH^* \rightarrow CH_3CH_2O^*+H^*$                   | -0.19/0.58 | 0.03/0.75  |            | -0.19/0.82 | 0.82/0.11 | -0.15/0.74 |
| $CH_3CH_2O^* \rightarrow CH_2CH_2O^*+H^*$                    | 0.51/0.55  | 0.52/0.96  |            |            |           |            |
| $CH_3CH_2O^*+OH^* \rightarrow CH_2CH_2O^*+H_2O^*$            | 0.66/0.78  |            |            |            |           |            |
| $CH_2CH_2O^* \rightarrow CH_2CH_2+O^*$                       | -0.11/1.00 | -0.08/0.90 |            |            |           |            |
| $CH_2CH_2O^* \rightarrow CH_2^*+CH_2O^*$                     | -0.45/0.24 | -0.67/0.93 |            |            |           |            |
| $CH_2O^* \rightarrow CHO^*+H^*$                              | -0.68/0.07 |            | -0.39/0.09 |            |           |            |
| $CHO^* \rightarrow CO^*+H^*$                                 | -1.19/0.34 |            | -1.03/0.32 |            |           |            |
| $CH_3CH_2O^* \rightarrow CH_3CHO^*+H^*$                      | 0.01/0.95  | -0.07/1.43 |            |            | 0.00/0.67 |            |
| $CH_3CHO^* \rightarrow CH_3CO^*+H^*$                         | -0.80/0.09 |            | -1.08/0.06 |            |           | -0.50/0.69 |
| $CH_3CO^* \rightarrow CH_3^*+CO^*$                           | -0.39/0.63 |            | 0.15/0.93  |            |           | -0.64/0.15 |
| $CH_3^*+H^* \rightarrow CH_4$                                | -0.08/0.60 | -0.49/0.58 | -0.20/0.57 |            |           | -0.20/1.18 |
| $2H^* \rightarrow H_2$                                       | 1.14/1.16  |            |            |            |           |            |
